# Supplementary material
Source: Elsevier journal article supplement (https://www.sciencedirect.com/science/article/pii/S0300893218302495)
Supplement: mmc1 [file S0300893218302495:mmc1.pdf]

## SUPPLEMENTARY MATERIAL

### Table of the supplementary material

Description of the ESC ACCA QI Domains for AMI

| Domain of care                                   | Type of QI            | Description                                                                                                   | Components/eligibility                                                                                                                                                                                                                                    |
|--------------------------------------------------|-----------------------|---------------------------------------------------------------------------------------------------------------|-----------------------------------------------------------------------------------------------------------------------------------------------------------------------------------------------------------------------------------------------------------|
| <b>1. Center organization</b>                    | 1.1 Main              | Center is part of a network organization.                                                                     | Single emergency telephone number, prehospital ECG, prehospital activation of the catheterization laboratory.                                                                                                                                             |
|                                                  | 1.2 Secondary 1       | Center routinely assesses relevant times for the reperfusion process in STEMI patients.                       | Times from “call to FMC”, “FMC to door”, “door to arterial access”, and “door-in-door-out” for centers without on-site catheterization laboratory.                                                                                                        |
|                                                  | 1.3 Secondary 2       | Center participates in a regular program for quality assessment.                                              |                                                                                                                                                                                                                                                           |
| <b>2. Reperfusion-invasive strategy</b>          | 2.1 Main (STEMI 1)    | Proportion of eligible STEMI patients reperfused.                                                             | Symptom onset to diagnosis < 12 h.                                                                                                                                                                                                                        |
|                                                  | 2.2 Main (STEMI 2)    | Proportion of eligible STEMI patients with timely reperfusion.                                                | For fibrinolysis: < 30 min from FMC to needle. For primary PCI and admission to PCI-capable centers: < 60 min from door to arterial access. For transferred patients: door-in door-out time < 30 min.                                                     |
|                                                  | 2.3 Main NSTEMI       | Proportion of high-intermediate-risk NSTEMI patients receiving coronary angiography within 72 h of admission. | High-intermediate risk: at least one of diabetes mellitus, renal dysfunction (eGFR < 30 mL/min/1.73 m <sup>2</sup> ), LVEF ≤ 0.40, heart failure, recent PCI, prior CABG, GRACE risk score > 140, recurrent symptoms, or ischemia on noninvasive testing. |
|                                                  | 2.3 Secondary (STEMI) | Time between FMC and arterial access for primary PCI.                                                         |                                                                                                                                                                                                                                                           |
| <b>3. Inhospital risk assessment</b>             | 3.1 Main (1)          | Proportion of NSTEMI patients with GRACE risk score assessment.                                               | GRACE risk score numerical value assessed and recorded in the discharge letter.                                                                                                                                                                           |
|                                                  | 3.2 Main (2)          | Proportion of AMI patients with CRUSADE bleeding score assessment.                                            | CRUSADE bleeding score numerical value assessed and recorded in the discharge letter.                                                                                                                                                                     |
|                                                  | 3.3 Main (3)          | Proportion of AMI patients with LVEF assessment.                                                              | LVEF numerical value assessed and recorded in the report of the last echocardiography during hospital stay.                                                                                                                                               |
| <b>4. Antithrombotics during hospitalization</b> | 4.1 Main (1)          | Proportion of patients with “adequate P2Y12 inhibition” on discharge.                                         | For ticagrelor: AMI patients without previous hemorrhagic stroke, high bleeding risk, fibrinolysis, or oral anticoagulation; prasugrel was not prescribed. For clopidogrel: no indication for prasugrel or ticagrelor and without high bleeding risk.     |
|                                                  | 4.2 Main (2)          | Proportion of patients with NSTEMI treated with fondaparinux.                                                 | Exclusion of candidates for immediate (≤ 2 h) invasive strategy or with eGFR < 20 mL/min.                                                                                                                                                                 |

|                                                    |                            |                                                                                                           |                                                                                                                                                                                                                                                                                                                                                                                                         |
|----------------------------------------------------|----------------------------|-----------------------------------------------------------------------------------------------------------|---------------------------------------------------------------------------------------------------------------------------------------------------------------------------------------------------------------------------------------------------------------------------------------------------------------------------------------------------------------------------------------------------------|
|                                                    | 4.3 Secondary              | Proportion of eligible patients discharged on dual antiplatelet therapy.                                  | Eligible: patients with CRUSADE risk score < 50 and without oral anticoagulation on discharge.                                                                                                                                                                                                                                                                                                          |
| <b>5. Secondary prevention-discharge treatment</b> | 5.1 Main                   | Proportion of patients with AMI discharged on high-intensity statins.                                     | Atorvastatin $\geq$ 40 mg or rosuvastatin $\geq$ 20 mg.                                                                                                                                                                                                                                                                                                                                                 |
|                                                    | 5.2 Secondary (1)          | Proportion of patients with AMI and clinical evidence of HF/LVEF $\leq$ 0.40 discharged on ACEIs/ARBs.    | Contraindications: systolic blood pressure of less than 100 mmHg or severe renal failure (eGFR <30 mL/min).                                                                                                                                                                                                                                                                                             |
|                                                    | 5.3 Secondary (2)          | Proportion of patients with AMI and clinical evidence of HF/LVEF $\leq$ 0.40 discharged on beta-blockers. | Contraindications: systolic blood pressure of less than 100 mmHg at discharge, asthma, and second- or third-degree atrioventricular block.                                                                                                                                                                                                                                                              |
| <b>6. Patient satisfaction</b>                     | 6.1 Main                   | Feedback systematically collected on patient's experience.                                                | Recommendation to attend a cardiac rehabilitation program used as surrogate.                                                                                                                                                                                                                                                                                                                            |
| <b>7. Composite and outcome QI</b>                 | 7.1 Main composite QI      | Opportunity-based composite QI.                                                                           | Center is part of a network organization, STEMI patients reperfused, coronary angiography in high ischemic risk AMI patients, GRACE in NSTEMI, CRUSADE in AMI patients, LVEF before discharge, low-dose aspirin, adequate P2Y <sub>12</sub> inhibition, ACEIs/ARBs in patients with HF/LVEF $\leq$ 0.40, beta-blockers in HF/LVEF $\leq$ 0.40, high-intensity statins, cardiac rehabilitation referral. |
|                                                    | 7.2 Secondary composite QI | All-or-none composite QI based on 3 or 5 components, according to LVEF.                                   | For patients without HF/with LVEF > 0.40: low-dose aspirin, P2Y <sub>12</sub> inhibitor, high-intensity statins. For patients with HF/with LVEF $\leq$ 0.40: low-dose aspirin, P2Y <sub>12</sub> inhibitor, high-intensity statins, ACEIs/ARBs, beta-blockers.                                                                                                                                          |
|                                                    | 7.3 Secondary outcome      | 30-day mortality rate adjusted for the GRACE 2.0 risk score.                                              | No information on follow-up was available for 29 patients and GRACE 2.0 risk score could not be calculated for 19 patients.                                                                                                                                                                                                                                                                             |

ACEIs/ARBs, angiotensin-converting enzyme inhibitors/angiotensin receptor blockers; AMI, acute myocardial infarction; CABG, coronary artery bypass surgery; ECG, electrocardiogram; eGFR, estimated glomerular filtration rate; FMC, first medical contact; HF, heart failure; LVEF, left ventricular ejection fraction; NSTEMI, non-ST-segment elevation acute myocardial infarction; PCI, percutaneous coronary intervention; QI, quality indicator; STEMI, ST-segment elevation myocardial infarction.
